# Supplementary material for: Indistinguishability and distinguishability between amide and ester moieties in the construction and properties of M6L8 octahedral nanocages
Source: Royal Society of Chemistry journal article supplement (doi:10.1039/c4dt02408g), 2014-11-04
Supplement: c4dt02408g1.pdf [file c4dt02408g1.pdf]

<Electronic Supplementary Information>

**Indistinguishability and distinguishability between amide and ester  
moieties in the construction and properties of  $M_6L_8$  octahedron nanocages**

Tae Hwan Noh, Woosik Hong, Haeri Lee and Ok-Sang Jung\*

Department of Chemistry, Pusan National University, Pusan 609-735, Korea

**Refinements of structures with the SQUEEZE routine in PLATON.**

For the three  $[Pd_6L_8]^{12+}$  cages, nitrate anions and solvent molecules in the voids were highly disordered and were impossible to refine using conventional discrete-atom models. Therefore, the residual electron density was treated as diffuse contributions using the SQUEEZE of the PLATON software and located a series of voids (see below).<sup>1</sup>

For **1**,

```
_platon_squeeze_void_nr  
_platon_squeeze_void_average_x  
_platon_squeeze_void_average_y  
_platon_squeeze_void_average_z  
_platon_squeeze_void_volume  
_platon_squeeze_void_count_electrons  
_platon_squeeze_void_content  
1 -0.022 -0.035 -0.002 26035 10461 ''  
_platon_squeeze_details  
;
```

For **2**,

```

_platon_squeeze_void_nr
_platon_squeeze_void_average_x
_platon_squeeze_void_average_y
_platon_squeeze_void_average_z
_platon_squeeze_void_volume
_platon_squeeze_void_count_electrons
_platon_squeeze_void_content
1 -0.011 -0.009 -0.002 30627 11432 ''
2 0.000 0.500 0.000 23 29 ''
3 0.167 0.333 0.333 23 29 ''
4 0.167 0.833 0.333 23 29 ''
5 0.333 0.167 0.667 23 30 ''
6 0.500 0.000 0.000 23 29 ''
7 0.500 0.500 0.000 23 29 ''
8 0.667 0.833 0.333 23 30 ''
9 0.833 0.167 0.667 23 29 ''
10 0.833 0.667 0.667 23 29 ''
_platon_squeeze_details
;

```

For 3,

```

_platon_squeeze_void_nr
_platon_squeeze_void_average_x
_platon_squeeze_void_average_y
_platon_squeeze_void_average_z
_platon_squeeze_void_volume
_platon_squeeze_void_count_electrons
_platon_squeeze_void_content
1 -0.012 -0.009 -0.001 31443 11817 ''
_platon_squeeze_details
;

```

**References for X-ray crystallography:**

1 A. L. Spek, *J. Appl. Crystallogr.*, 2003, **36**, 7-13.

**Table S1** Crystal data for **1**, **2**, and **3**

|                                                                          | <b>1</b>                                                                                                                                                                                            | <b>2</b>                                                                                                                                                                                            | <b>3</b>                                                                                                                                                                                                                                                                     |
|--------------------------------------------------------------------------|-----------------------------------------------------------------------------------------------------------------------------------------------------------------------------------------------------|-----------------------------------------------------------------------------------------------------------------------------------------------------------------------------------------------------|------------------------------------------------------------------------------------------------------------------------------------------------------------------------------------------------------------------------------------------------------------------------------|
| Complex                                                                  | [Pd <sub>6</sub> (C <sub>36</sub> H <sub>21</sub> N <sub>3</sub> O <sub>6</sub> ) <sub>8</sub> ]-<br>(NO <sub>3</sub> ) <sub>12</sub> ·11H <sub>2</sub> O·-<br>10(CH <sub>3</sub> ) <sub>2</sub> SO | [Pd <sub>6</sub> (C <sub>36</sub> H <sub>21</sub> N <sub>6</sub> O <sub>3</sub> ) <sub>8</sub> ]-<br>(NO <sub>3</sub> ) <sub>12</sub> ·10H <sub>2</sub> O·-<br>13(CH <sub>3</sub> ) <sub>2</sub> SO | [Pd <sub>6</sub> (C <sub>36</sub> H <sub>21</sub> N <sub>3</sub> O <sub>6</sub> ) <sub>4</sub> (C <sub>36</sub> H <sub>21</sub> N <sub>6</sub> O <sub>3</sub> ) <sub>4</sub> ]-<br>(NO <sub>3</sub> ) <sub>12</sub> ·13H <sub>2</sub> O·14(CH <sub>3</sub> ) <sub>2</sub> SO |
| Formula*                                                                 | C <sub>300</sub> H <sub>204</sub> N <sub>24</sub> O <sub>54</sub> S <sub>6</sub> Pd <sub>6</sub>                                                                                                    | C <sub>288</sub> H <sub>192</sub> N <sub>48</sub> O <sub>24</sub> Pd <sub>6</sub>                                                                                                                   | C <sub>291</sub> H <sub>183</sub> N <sub>36</sub> O <sub>36</sub> Pd <sub>6</sub>                                                                                                                                                                                            |
| <i>M<sub>w</sub></i> * (g mol <sup>-1</sup> )                            | 5839.63                                                                                                                                                                                             | 5347.30                                                                                                                                                                                             | 5398.13                                                                                                                                                                                                                                                                      |
| Cryst. system                                                            | Rhombohedral                                                                                                                                                                                        | Rhombohedral                                                                                                                                                                                        | Rhombohedral                                                                                                                                                                                                                                                                 |
| Space group                                                              | <i>R</i> -3                                                                                                                                                                                         | <i>R</i> -3                                                                                                                                                                                         | <i>R</i> -3                                                                                                                                                                                                                                                                  |
| <i>a</i> (Å)                                                             | 28.372(1)                                                                                                                                                                                           | 45.1264(7)                                                                                                                                                                                          | 45.5042(7)                                                                                                                                                                                                                                                                   |
| <i>c</i> (Å)                                                             | 59.480(2)                                                                                                                                                                                           | 27.6353(4)                                                                                                                                                                                          | 27.6805(4)                                                                                                                                                                                                                                                                   |
| <i>γ</i> (°)                                                             | 120                                                                                                                                                                                                 | 120                                                                                                                                                                                                 | 120                                                                                                                                                                                                                                                                          |
| <i>V</i> (Å <sup>3</sup> )                                               | 41466(3)                                                                                                                                                                                            | 48736(1)                                                                                                                                                                                            | 48984(1)                                                                                                                                                                                                                                                                     |
| <i>σ</i> * (Mg m <sup>-3</sup> )                                         | 0.702                                                                                                                                                                                               | 0.547                                                                                                                                                                                               | 0.549                                                                                                                                                                                                                                                                        |
| <i>Z</i>                                                                 | 3                                                                                                                                                                                                   | 3                                                                                                                                                                                                   | 3                                                                                                                                                                                                                                                                            |
| <i>μ</i> (mm <sup>-1</sup> )                                             | 0.254                                                                                                                                                                                               | 0.193                                                                                                                                                                                               | 0.193                                                                                                                                                                                                                                                                        |
| Data corrected                                                           | 216733                                                                                                                                                                                              | 268667                                                                                                                                                                                              | 261632                                                                                                                                                                                                                                                                       |
| Completeness                                                             | 100 ( <i>θ</i> = 26.5°)                                                                                                                                                                             | 100 ( <i>θ</i> = 26.5°)                                                                                                                                                                             | 100 ( <i>θ</i> = 26.0°)                                                                                                                                                                                                                                                      |
| <i>R</i> <sub>int</sub>                                                  | 0.1453                                                                                                                                                                                              | 0.1219                                                                                                                                                                                              | 0.1280                                                                                                                                                                                                                                                                       |
| Parameters                                                               | 586                                                                                                                                                                                                 | 874                                                                                                                                                                                                 | 874                                                                                                                                                                                                                                                                          |
| GoF on <i>F</i> <sup>2</sup>                                             | 0.944                                                                                                                                                                                               | 1.036                                                                                                                                                                                               | 0.852                                                                                                                                                                                                                                                                        |
| <i>R</i> <sub>1</sub> [ <i>I</i> > 2 <i>σ</i> ( <i>I</i> )] <sup>a</sup> | 0.0889                                                                                                                                                                                              | 0.0549                                                                                                                                                                                              | 0.0626                                                                                                                                                                                                                                                                       |
| <i>wR</i> <sub>2</sub> (all data) <sup>b</sup>                           | 0.2398                                                                                                                                                                                              | 0.1348                                                                                                                                                                                              | 0.1843                                                                                                                                                                                                                                                                       |

$$^a R_1 = \sum ||F_o| - |F_c|| / \sum |F_o|, \quad ^b wR_2 = (\sum [w(F_o^2 - F_c^2)^2] / \sum [w(F_o^2)^2])^{1/2}$$

\*The anions and solvent molecules are missing from this formula since they could not be located due to extensive disorder.

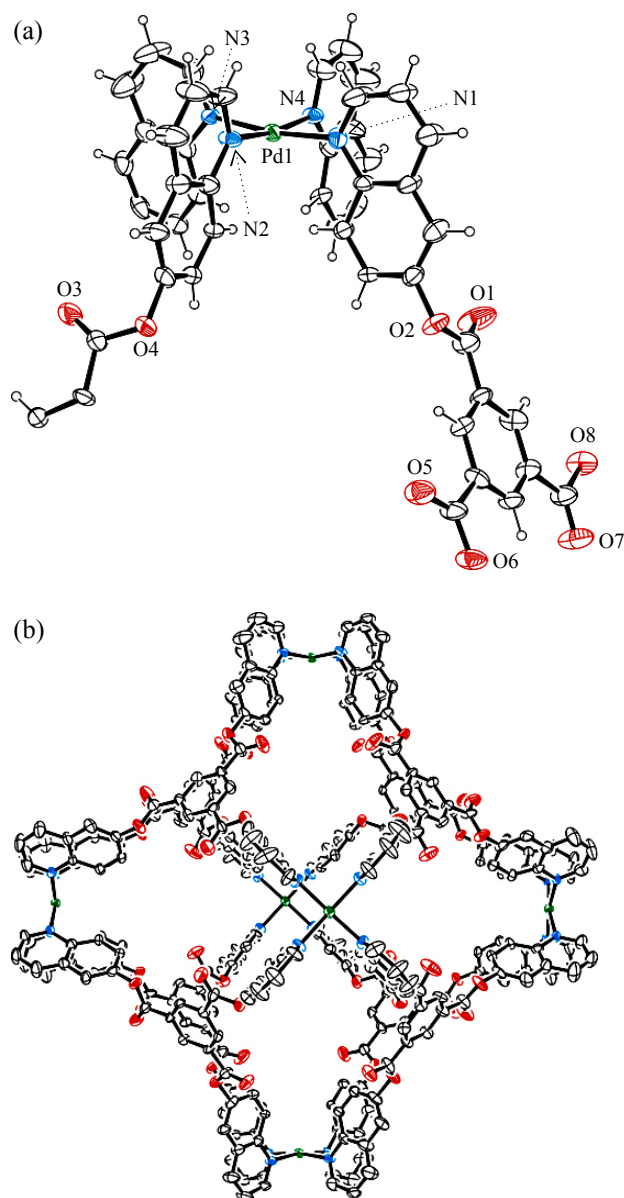

**Fig. S1** ORTEP drawings of **1** showing the asymmetric unit (a) and the cage (b).

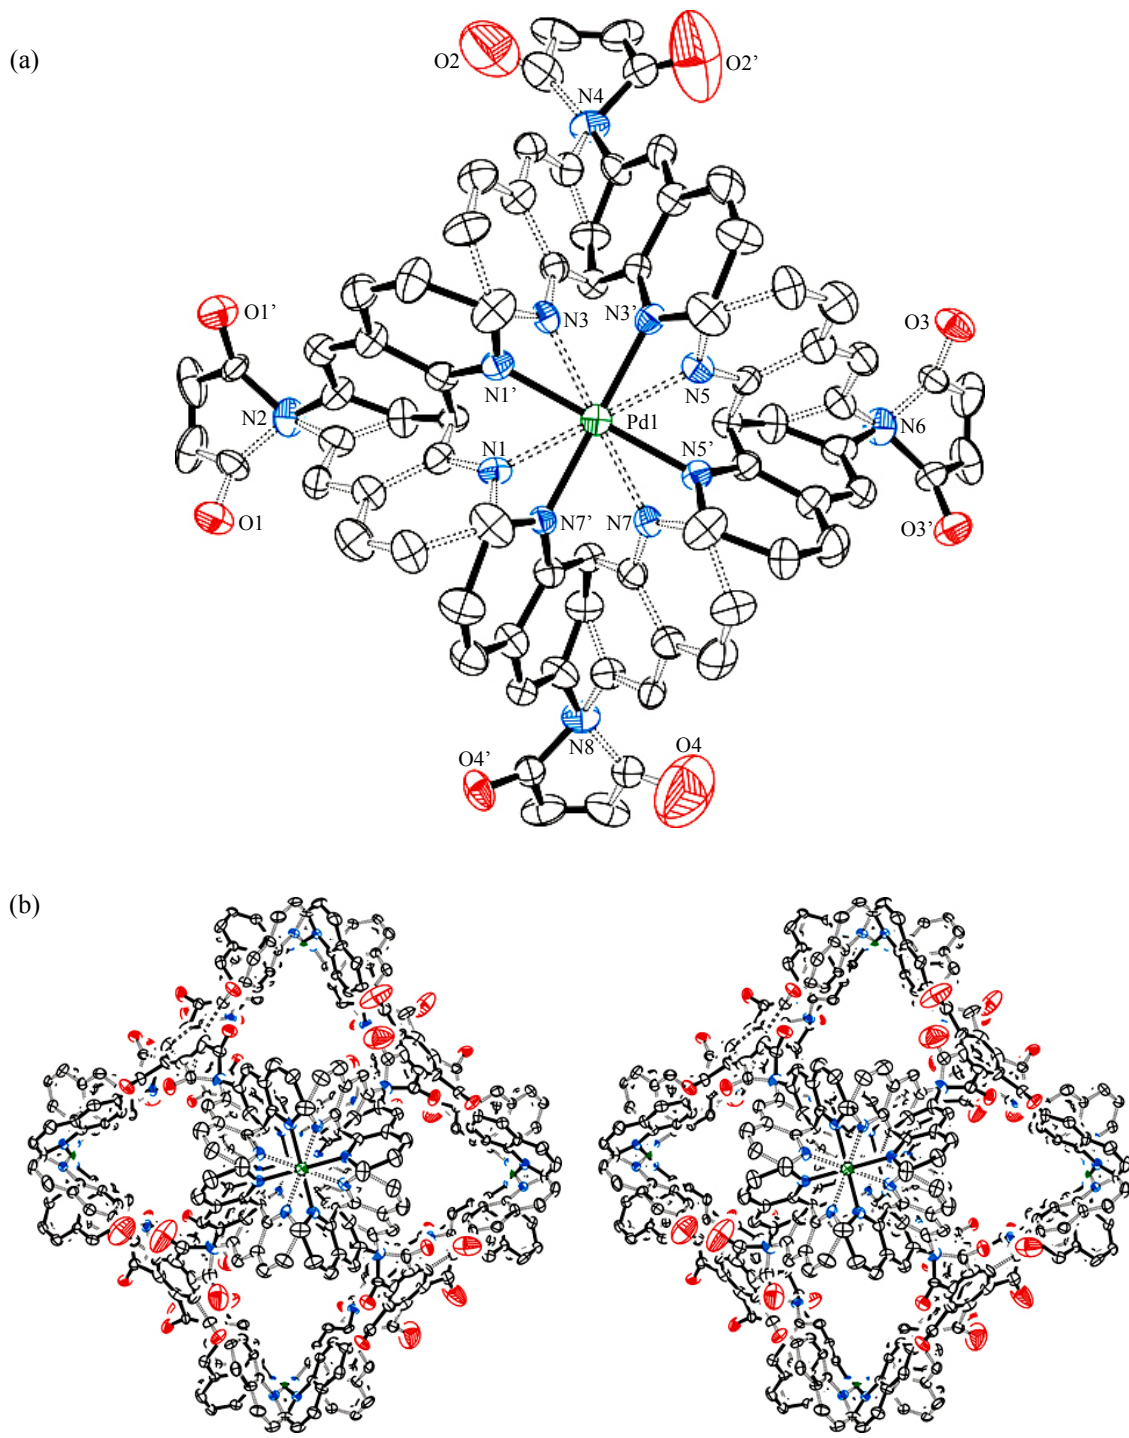

**Fig. S2** Asymmetric unit (a) and stereo projection (b) of X-ray crystal structure for **2**. Hydrogen atoms, nitrate anions, and solvate molecules were omitted for clarity. Occupancies of each disorder are 50 : 50.

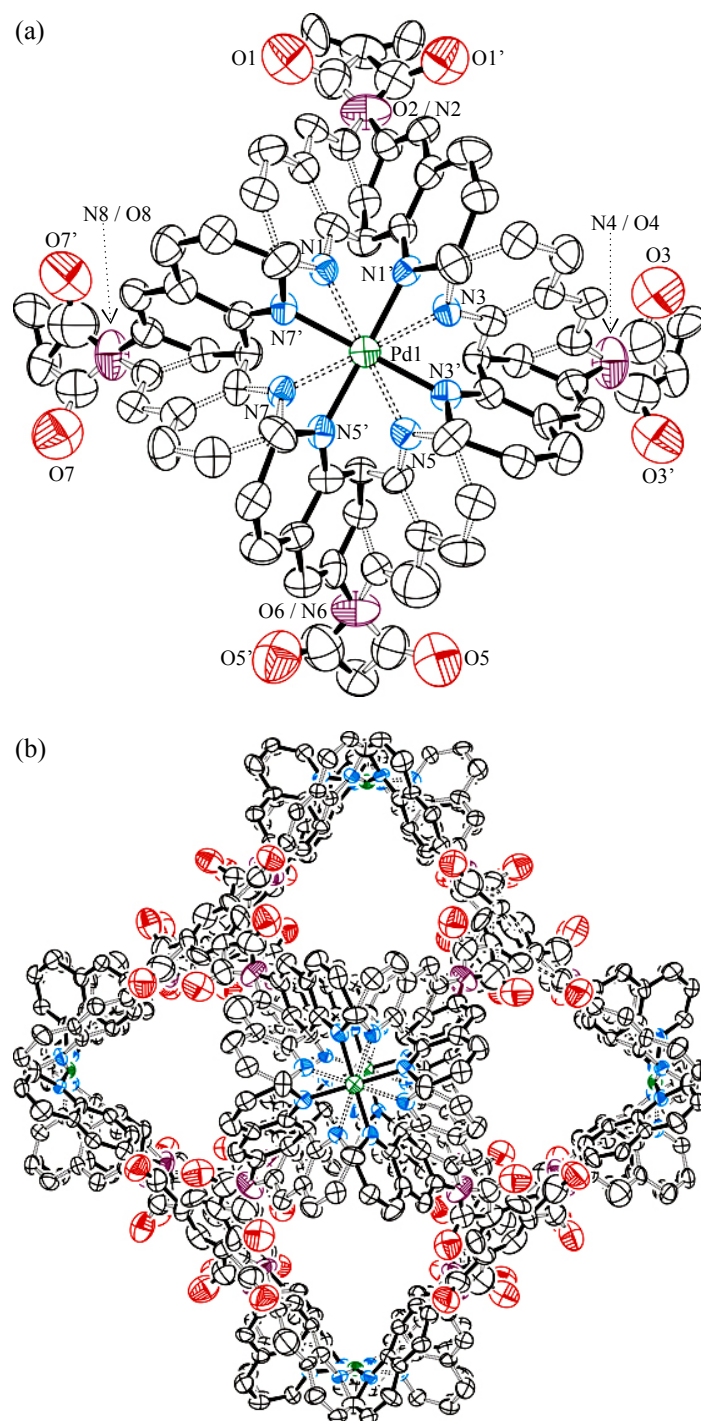

**Fig. S3** ORTEP drawings of **3** showing the asymmetric unit (a) and the cage (b).

Substitutional disorder between oxygen and nitrogen atoms was introduced. Hydrogen atoms, nitrate anions, and solvate molecules were omitted for clarity. Occupancies of each disorder are 50 : 50.

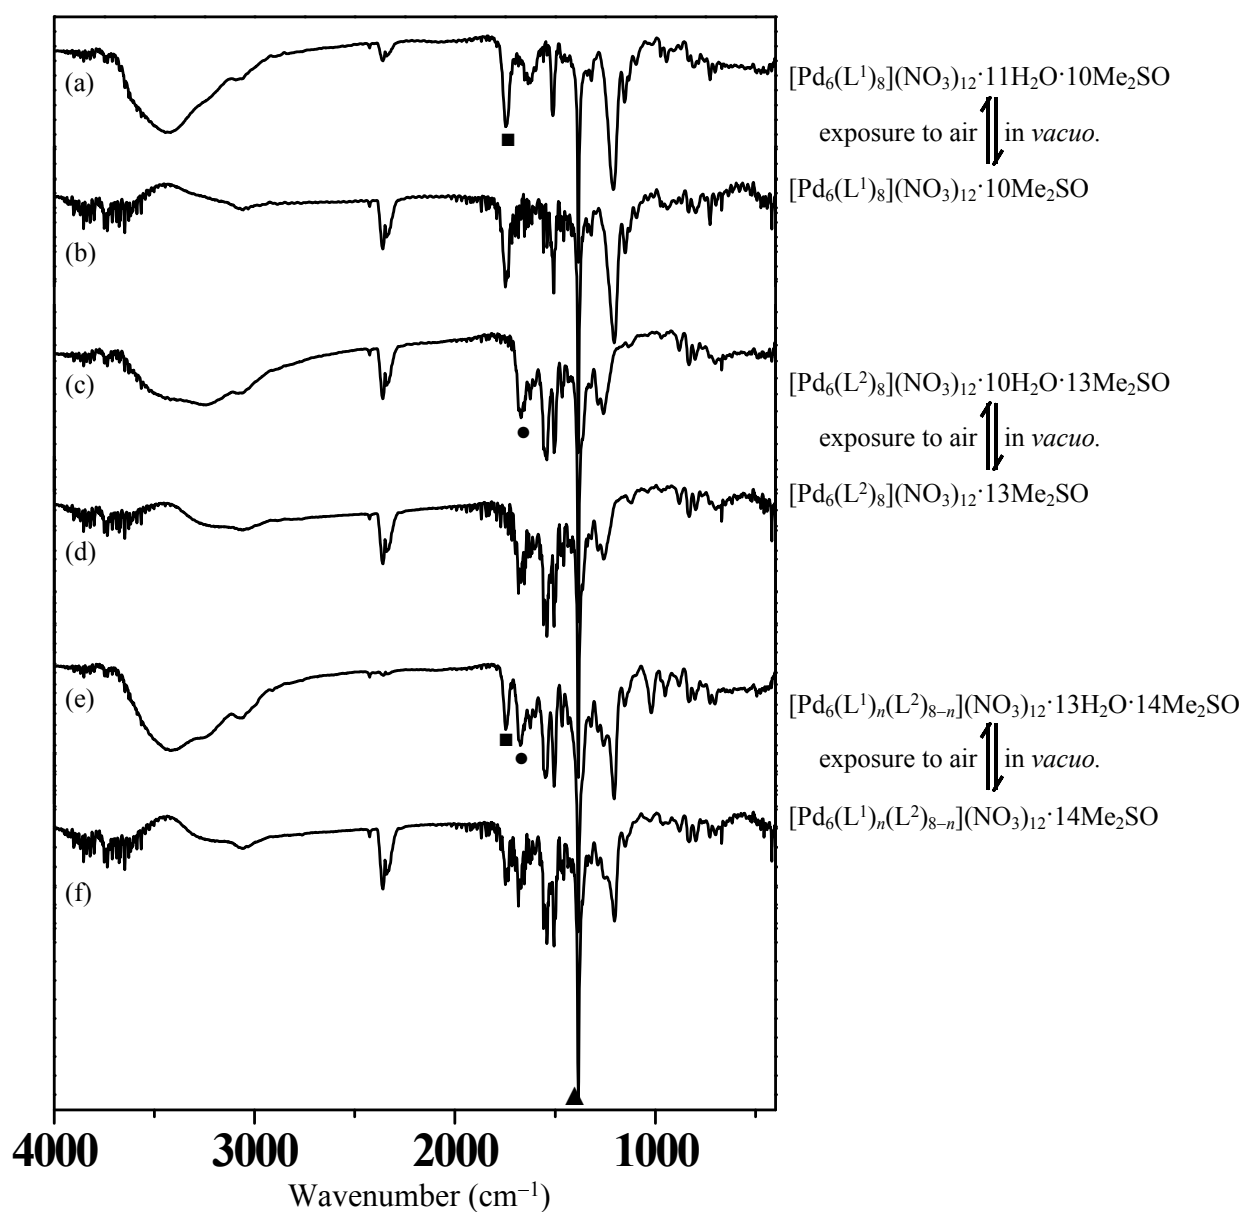

**Fig. S4** IR spectra for **1** (a), **2** (c), and **3** (e). (b), (d), and (f) show the IR spectra of the dried samples of **1**, **2**, and **3**, respectively. Squares, circles, and triangle denote the stretching frequencies for carbonyl moieties of ester groups, carbonyl moieties of amide groups, and nitrate anions, respectively. The IR band around  $2400 \text{ cm}^{-1}$  comes from  $\text{CO}_2$  in air.



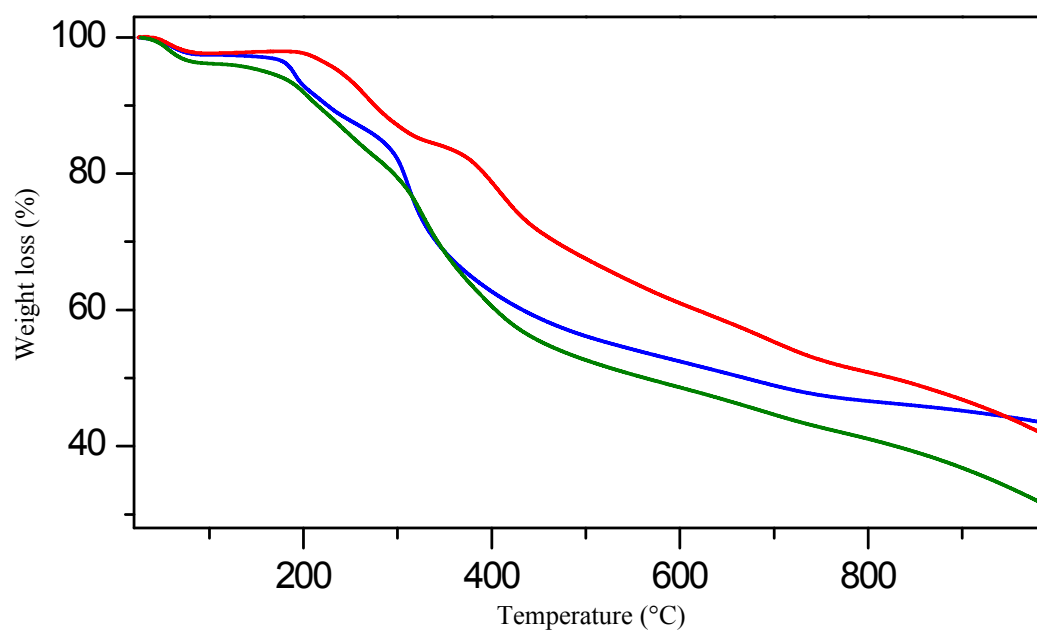

**Fig. S5** TGA curves for **1** (blue), **2** (red), and **3** (green).

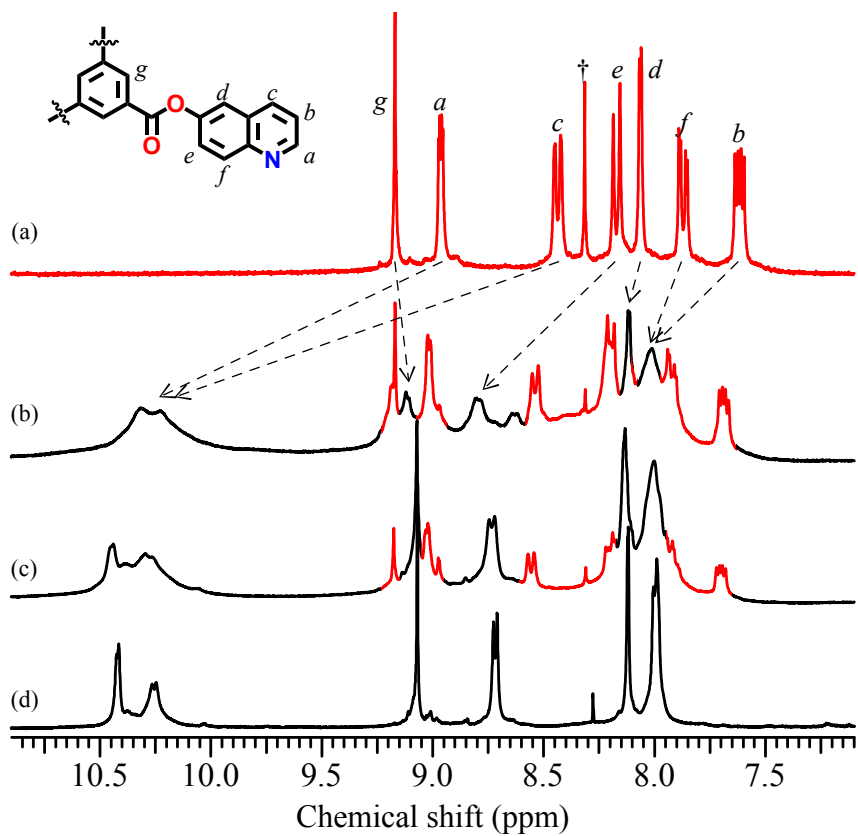

**Fig. S6**  $^1\text{H}$  NMR ( $\text{Me}_2\text{SO}-d_6$ ) spectra for the self-assembly process of **1** from the components  $\text{Pd}(\text{NO}_3)_2$  and  $\text{L}^1$  in 3 : 4 mole ratio at 80 °C for 5 min (b), 3 h (c), and 7 h (d). (a) represents the resonance of  $\text{L}^1$ . Asterisk denotes  $\text{CHCl}_3$ .

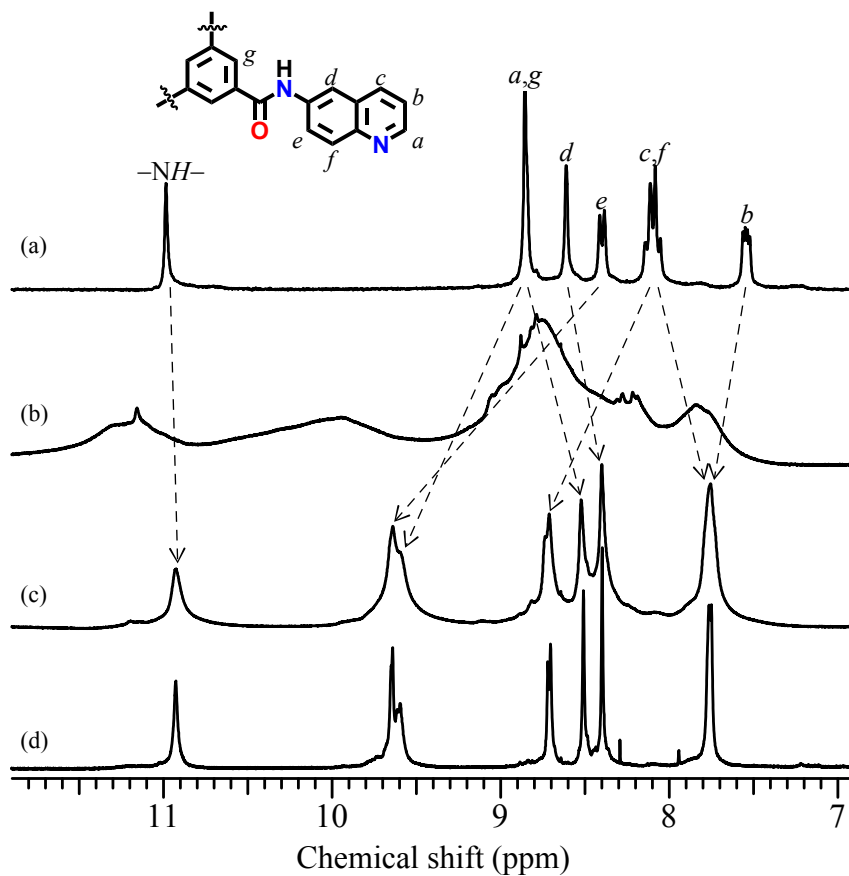

**Fig. S7**  $^1H$  NMR ( $Me_2SO-d_6$ ) spectra for the self-assembly process of **2** from the components  $Pd(NO_3)_2$  and  $L^2$  in 3 : 4 mole ratio at 80 °C for 5 min (b), 3 h (c), and 7 h (d). (a) represents the resonance of  $L^2$ .

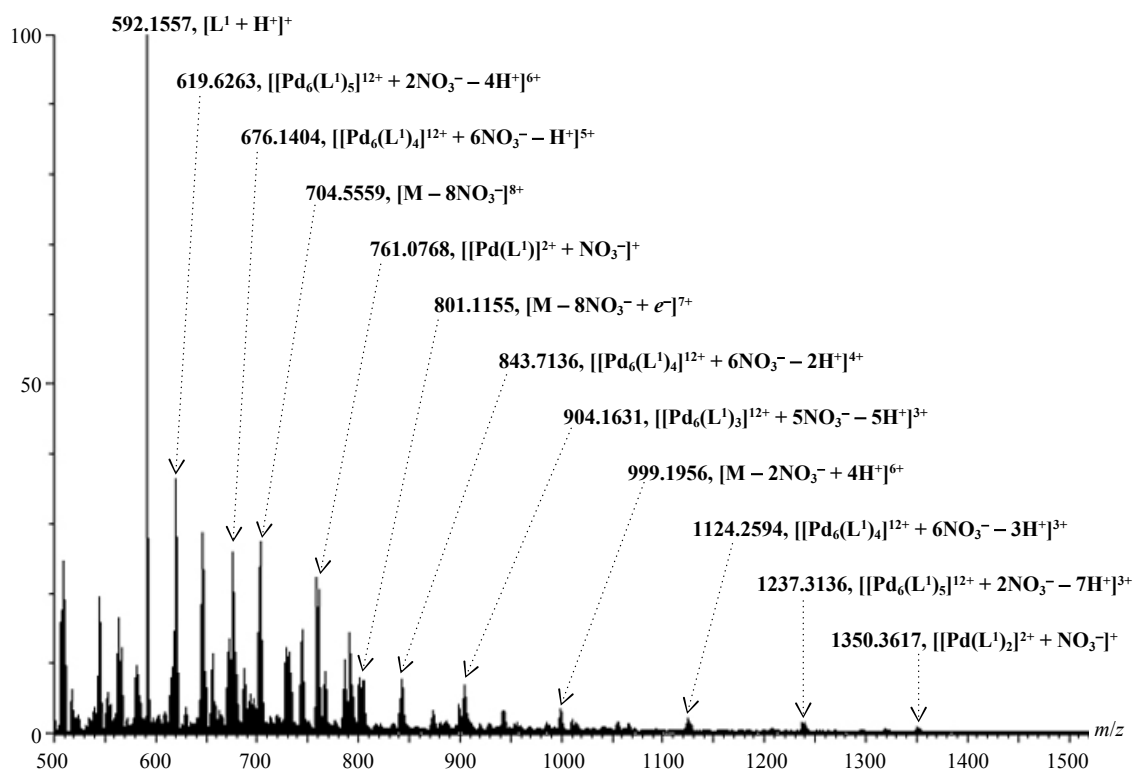

**Fig. S8** ESI-MS data of **1**.

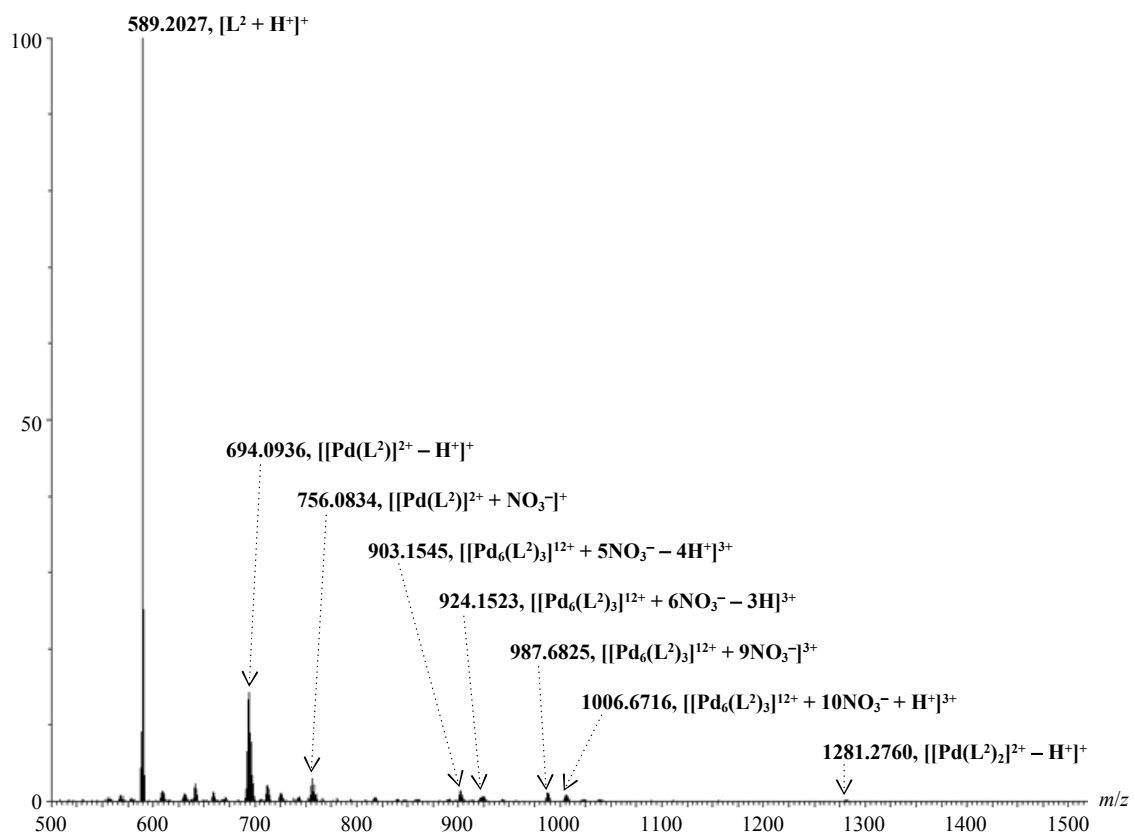

**Fig. S9** ESI-MS data of **2**.

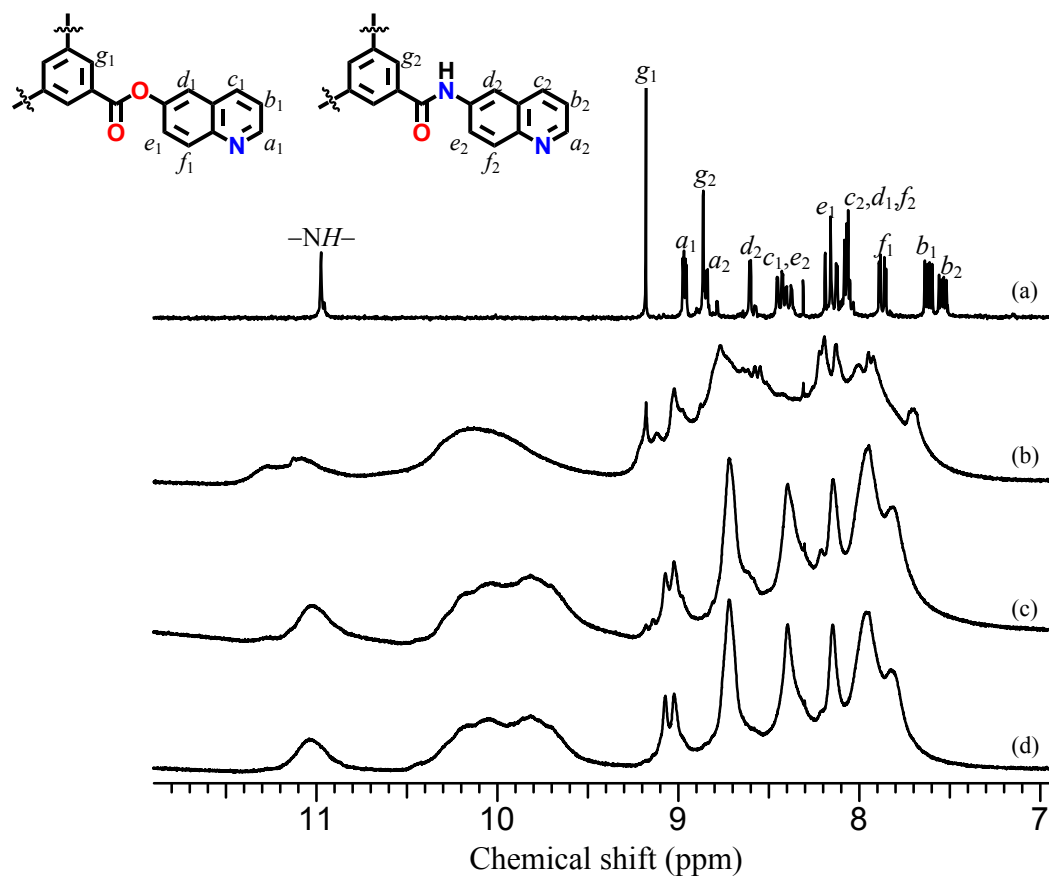

**Fig. S10**  $^1\text{H}$  NMR spectra ( $\text{Me}_2\text{SO}-d_6$ ) for the self-assembly process of **3** from the components  $\text{Pd}(\text{NO}_3)_2$ ,  $\text{L}^1$ , and  $\text{L}^2$  in 3 : 2 : 2 mole ratio at 80 °C for 5 min (b), 3 h (c), and 7 h (d). (a) represents the resonance of a mixture of  $\text{L}^1$  and  $\text{L}^2$ .

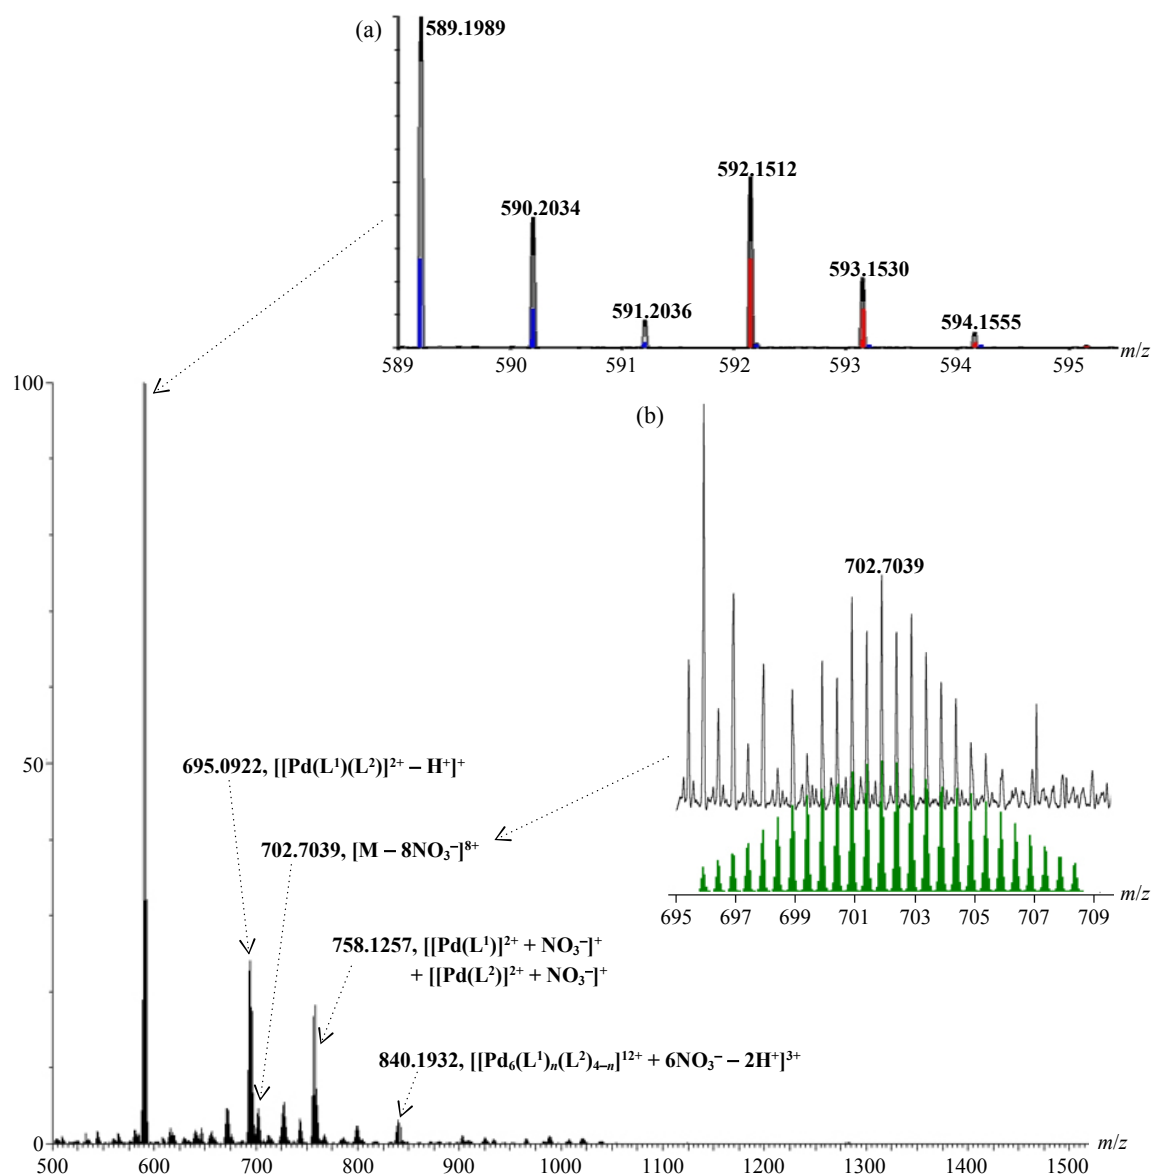

**Fig. S11** ESI-MS data of **3**. (a) Calculated ( $L^1$ , red;  $L^2$ , blue) and experimental mass data (black) of  $[L^1 + H^+]^+$  and  $[L^2 + H^+]^+$ . (b) Calculated (green) and experimental mass peaks (black) of  $[M - 8NO_3]^{8+}$ .

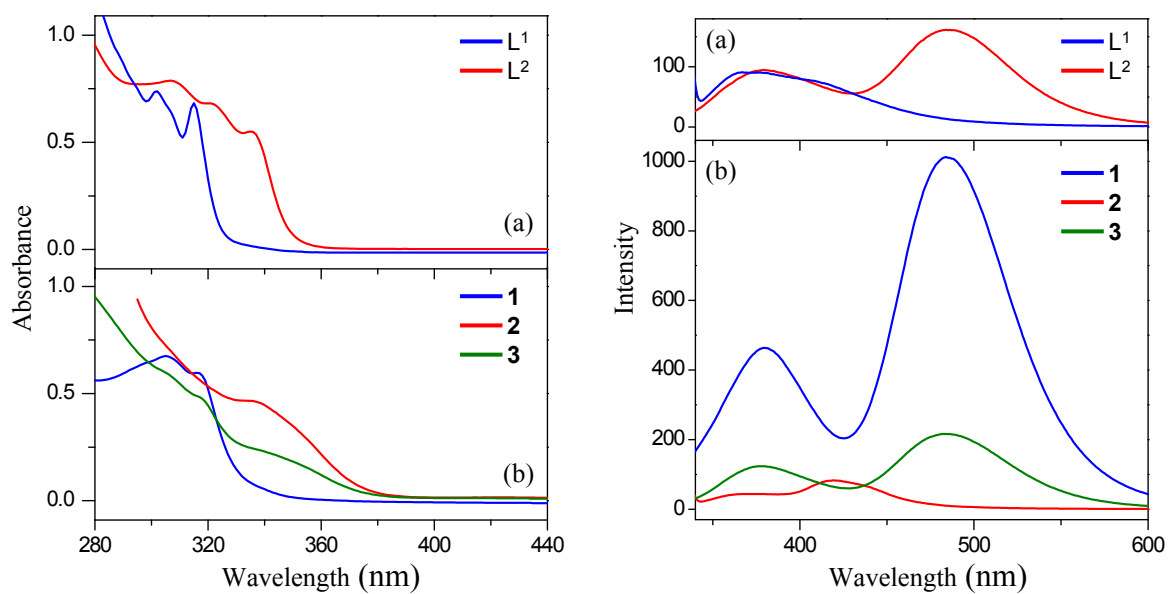

**Fig. S12** UV-vis (left) and PL (right) spectra in a mixed DMF and water solution ( $v/v = 4:1$ ) of the ligands (a) and cage complexes (b).
